# Supplementary material for: Carborane-Containing Folic Acid bis-Amides: Synthesis and In Vitro Evaluation of Novel Promising Agents for Boron Delivery to Tumour Cells
Source: MDPI journal article supplement (doi:10.3390/ijms232213726), 2022-11-08
Supplement: s1 [file s1]

# Supplementary Materials

## Carborane-Containing Folic Acid *bis*-Amides: Synthesis and *In Vitro* Evaluation of Novel Promising Agents for Boron Delivery to Tumour Cells

Dmitry A. Gruzdev <sup>1\*</sup>, Angelina A. Telegina <sup>1</sup>, Galina L. Levit <sup>1</sup>, Olga I. Solovieva <sup>2,3</sup>, Tatiana Ya. Gusel'nikova <sup>3,4</sup>, Ivan A. Razumov <sup>2,3</sup>, Victor P. Krasnov <sup>1</sup> and Valery N. Charushin <sup>1,5</sup>

<sup>1</sup> Postovsky Institute of Organic Synthesis, Russian Academy of Sciences (Ural Branch), Ekaterinburg 620108, Russia

<sup>2</sup> Institute of Cytology and Genetics, Russian Academy of Sciences (Siberian Branch), Novosibirsk 630090, Russia

<sup>3</sup> Novosibirsk State University, Novosibirsk 630090, Russia

<sup>4</sup> Nikolaev Institute of Inorganic Chemistry, Russian Academy of Sciences (Siberian Branch), Novosibirsk 630090, Russia

<sup>5</sup> Institute of Chemical Engineering, Ural Federal University, Ekaterinburg 620002, Russia

## NMR Spectra

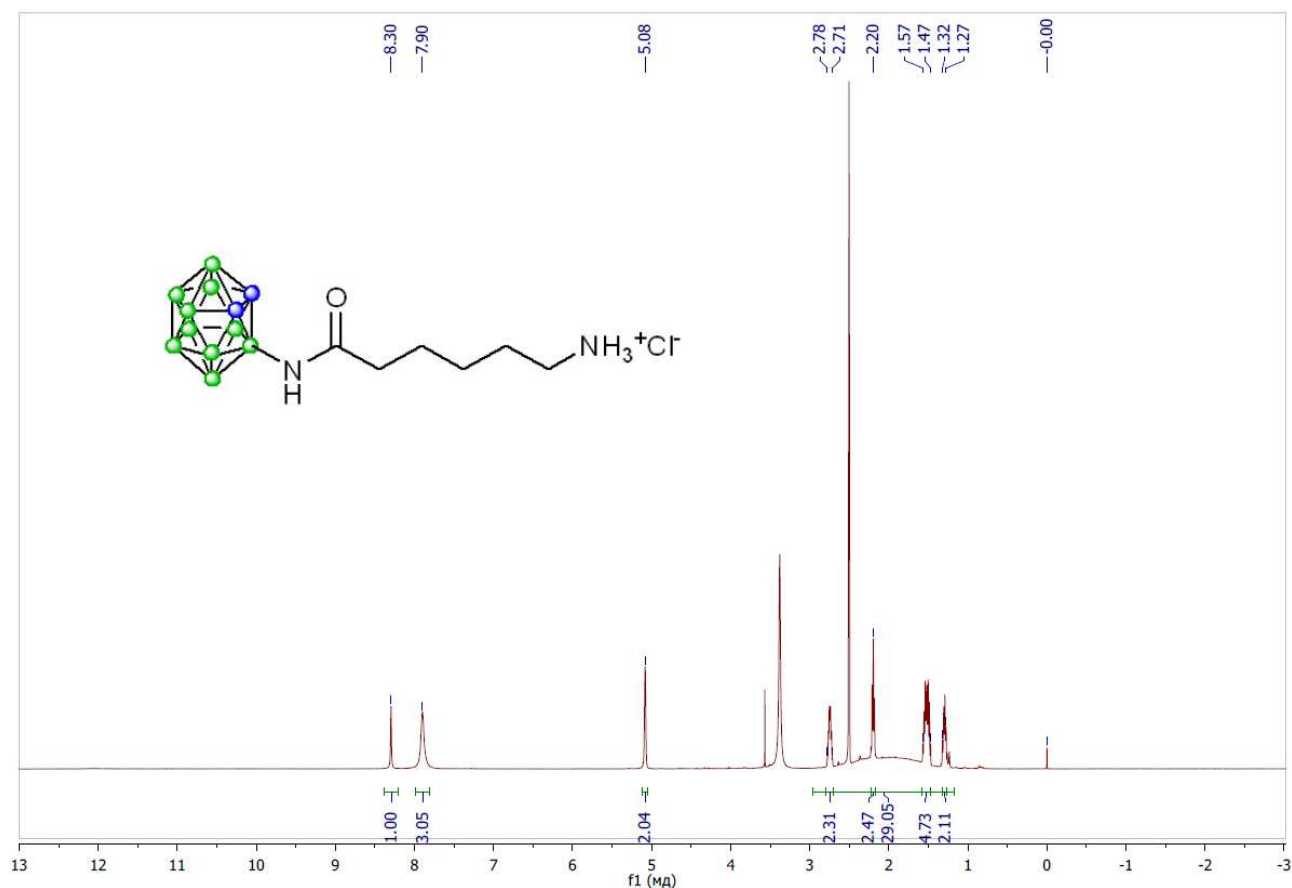

**Figure S1.** <sup>1</sup>H NMR spectrum of compound **1c** (DMSO-*d*<sub>6</sub>, 500 MHz)

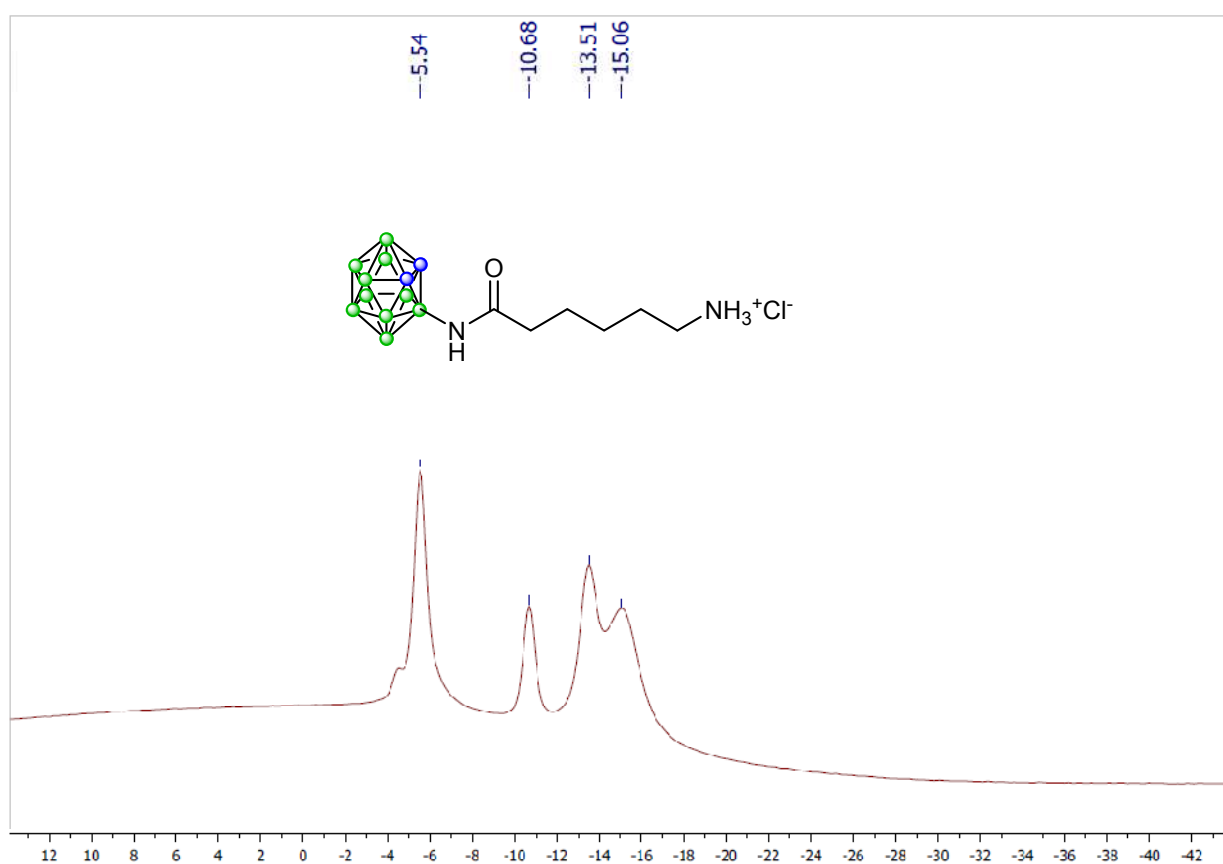

**Figure S2.** <sup>11</sup>B NMR spectrum of compound **1c** (DMSO-*d*<sub>6</sub>, 160 MHz)

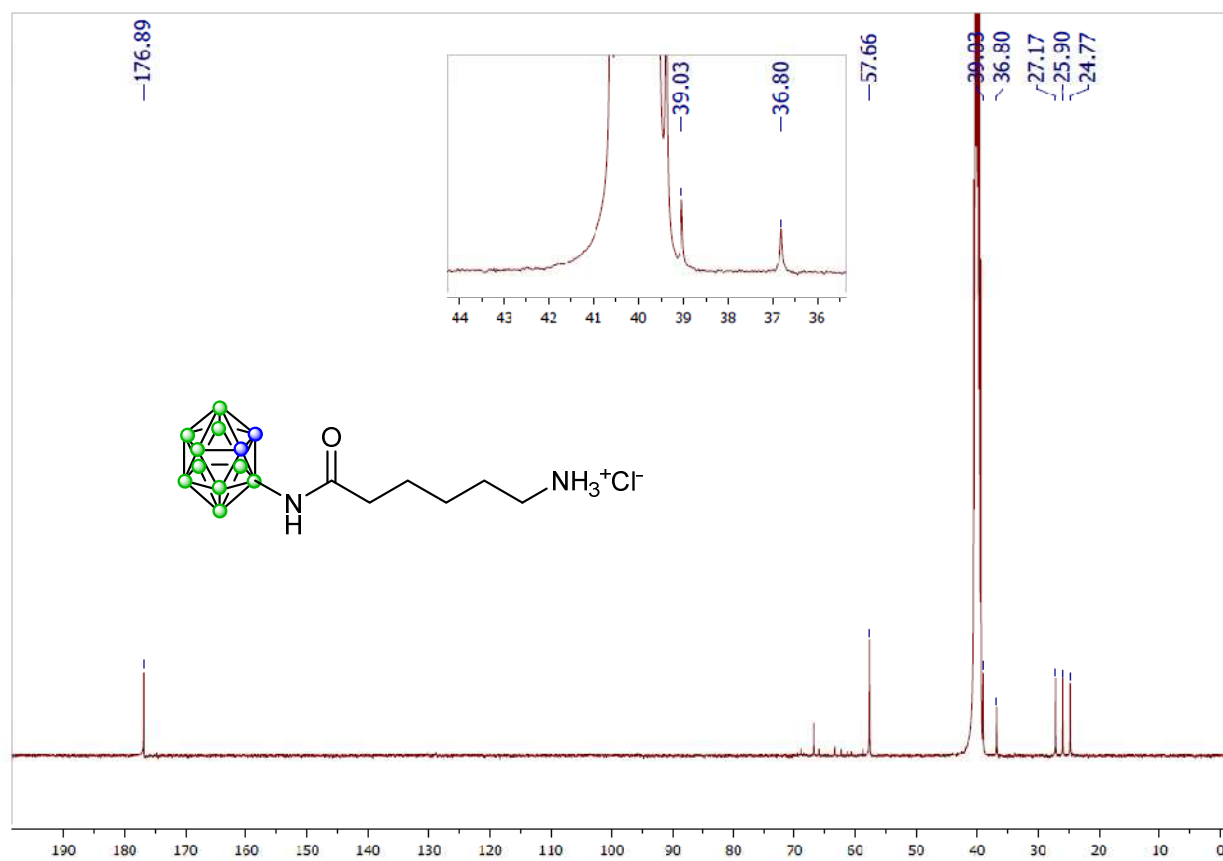

**Figure S3.** <sup>13</sup>C NMR spectrum of compound **1c** (DMSO-*d*<sub>6</sub>, 100 MHz)

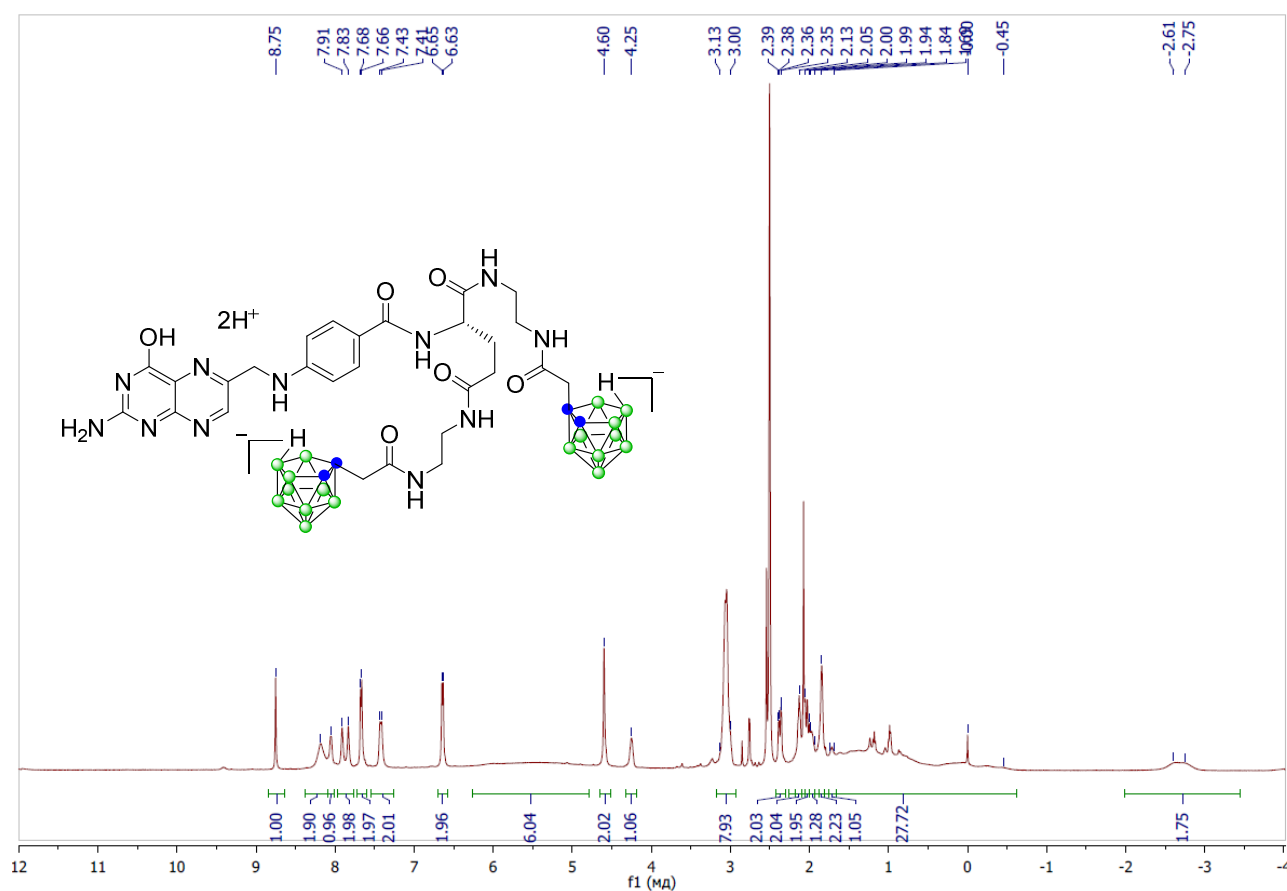

**Figure S4.** <sup>1</sup>H NMR spectrum of compound **3a** (DMSO-*d*<sub>6</sub>, 500 MHz)

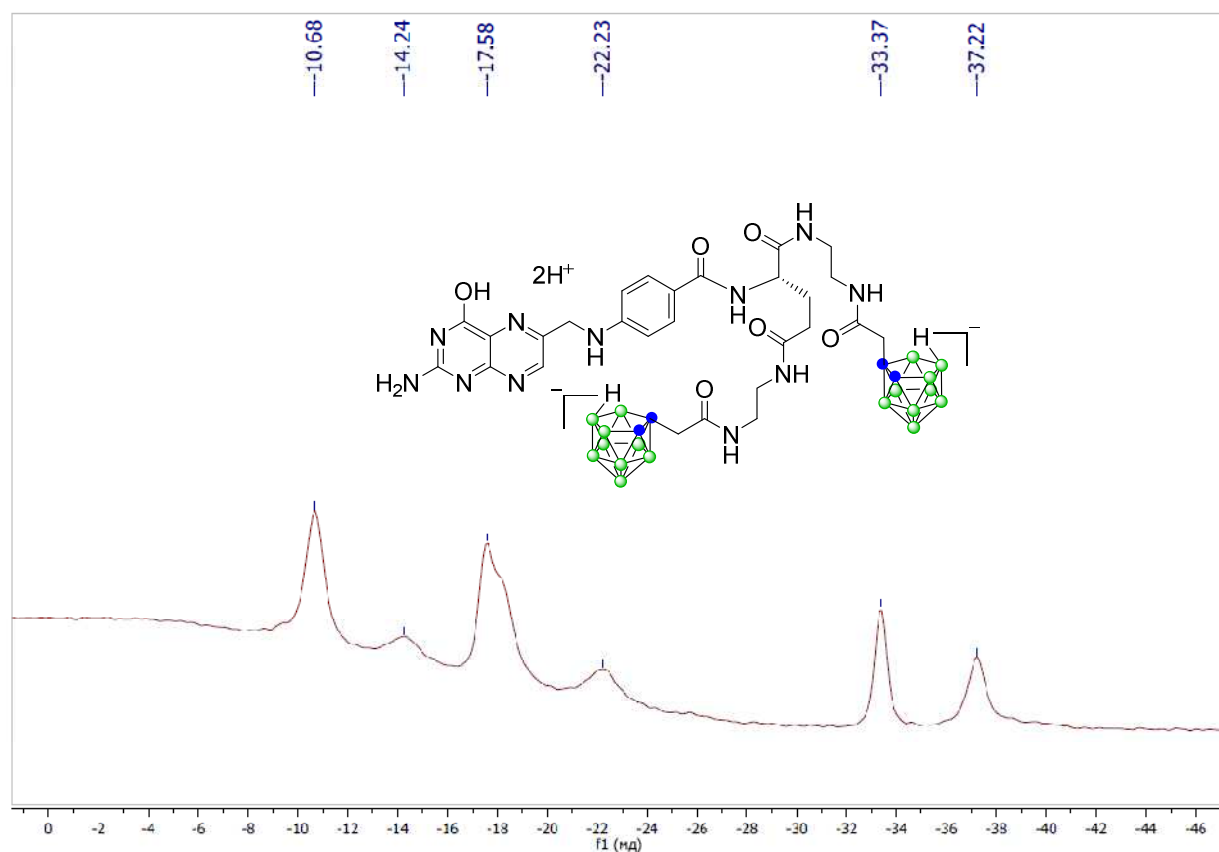

**Figure S5.** <sup>11</sup>B NMR spectrum of compound **3a** (DMSO-*d*<sub>6</sub>, 160 MHz)

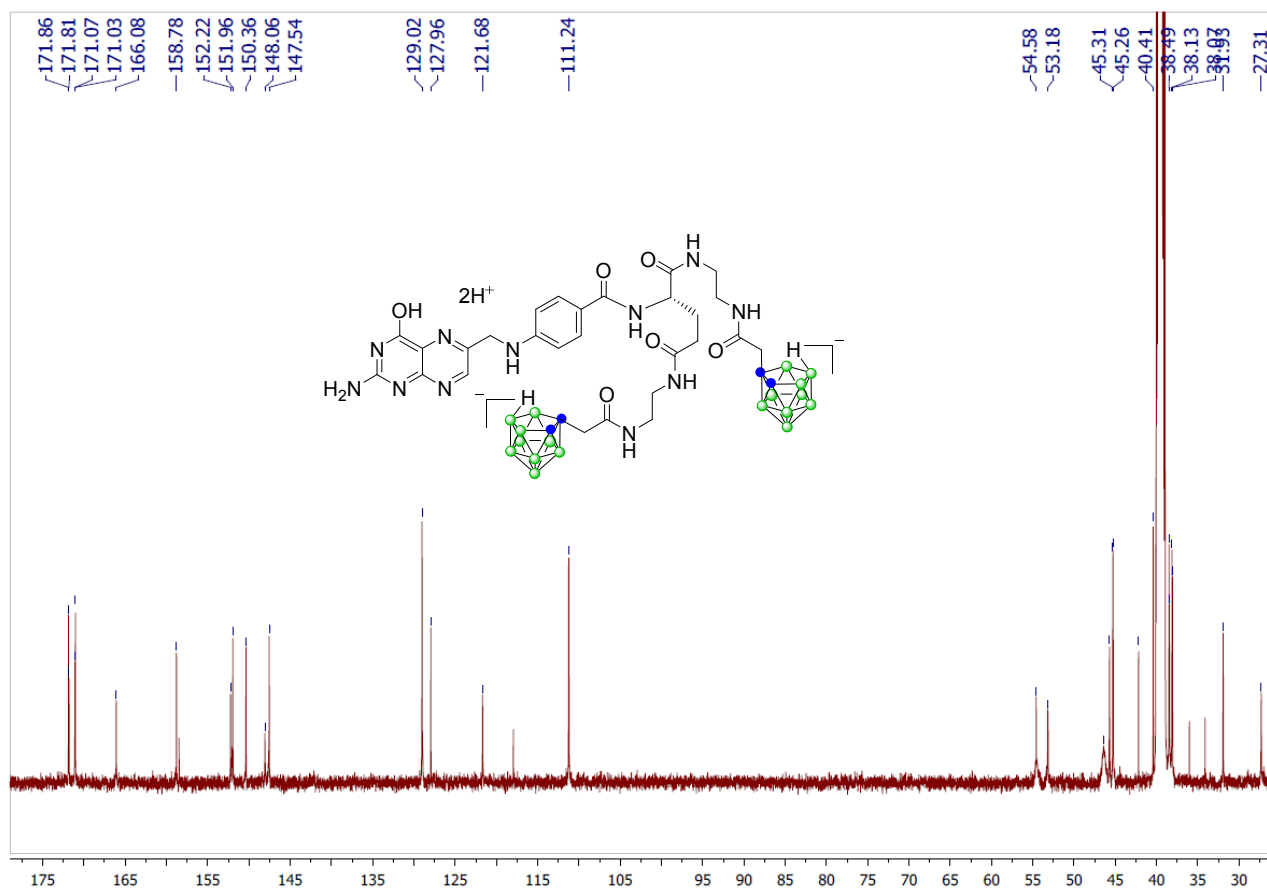

**Figure S6.** <sup>13</sup>C NMR spectrum of compound **3a** (DMSO-*d*<sub>6</sub>, 126 MHz)

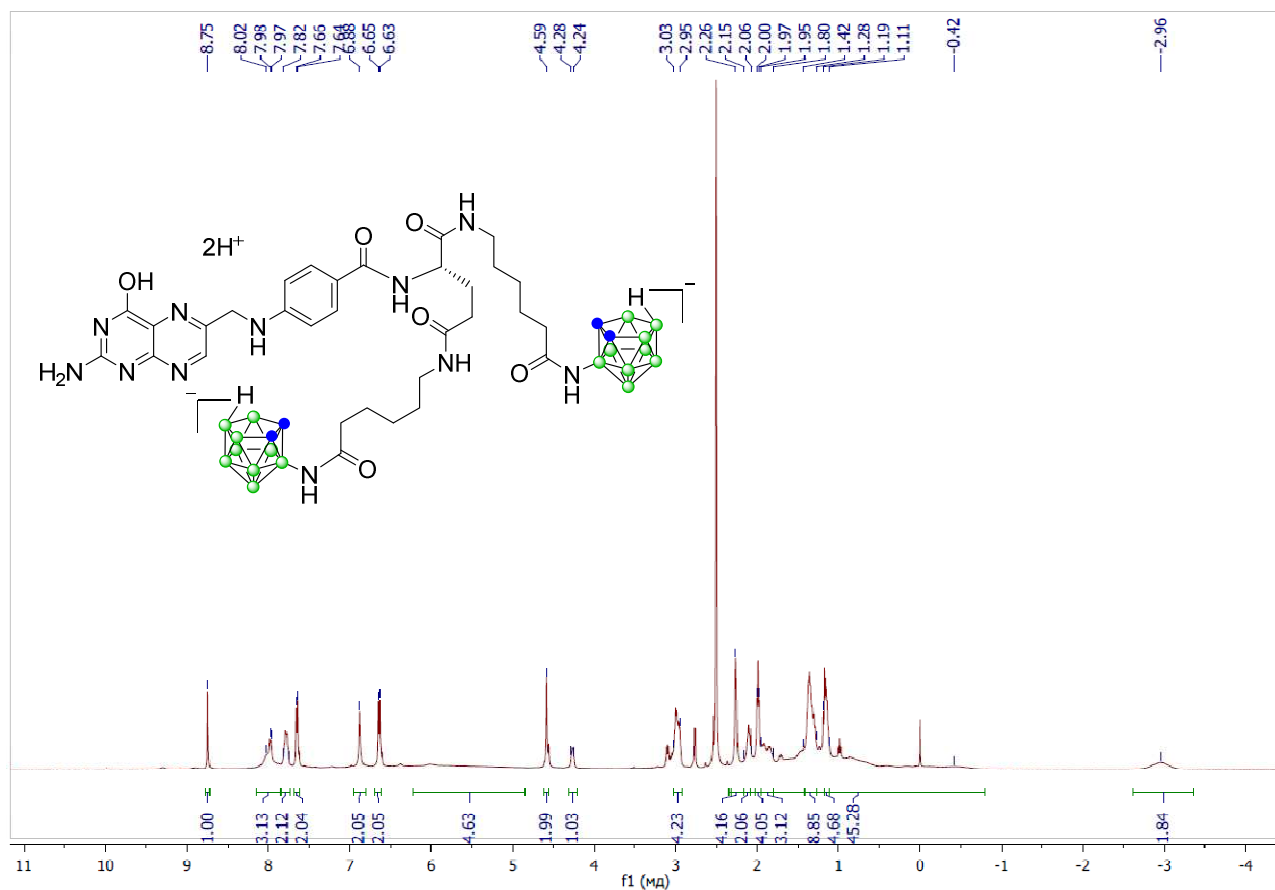

**Figure S7.** <sup>1</sup>H NMR spectrum of compound **3b** (DMSO-*d*<sub>6</sub>, 500 MHz)

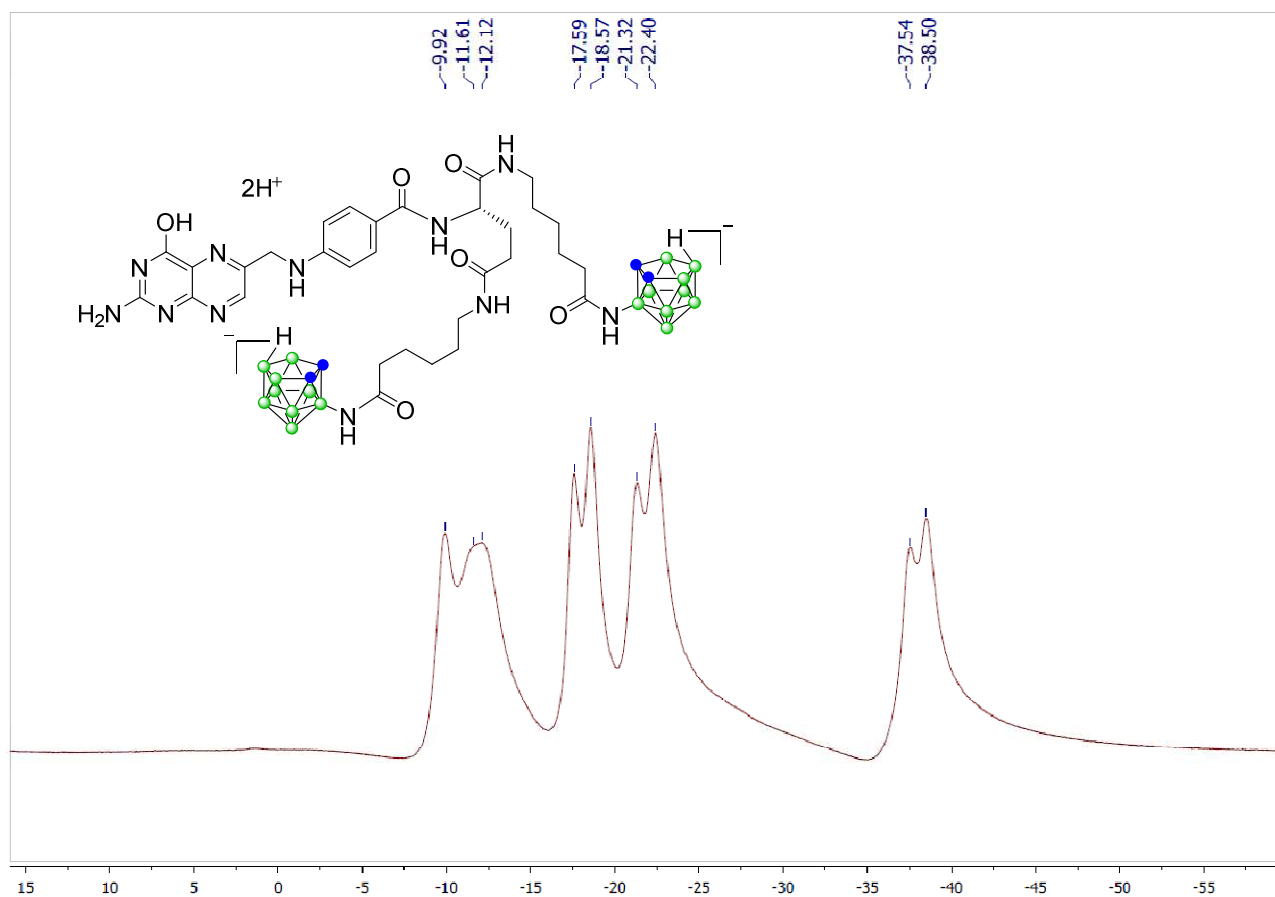

**Figure S8.** <sup>11</sup>B NMR spectrum of compound **3b** (DMSO-*d*<sub>6</sub>, 128 MHz)

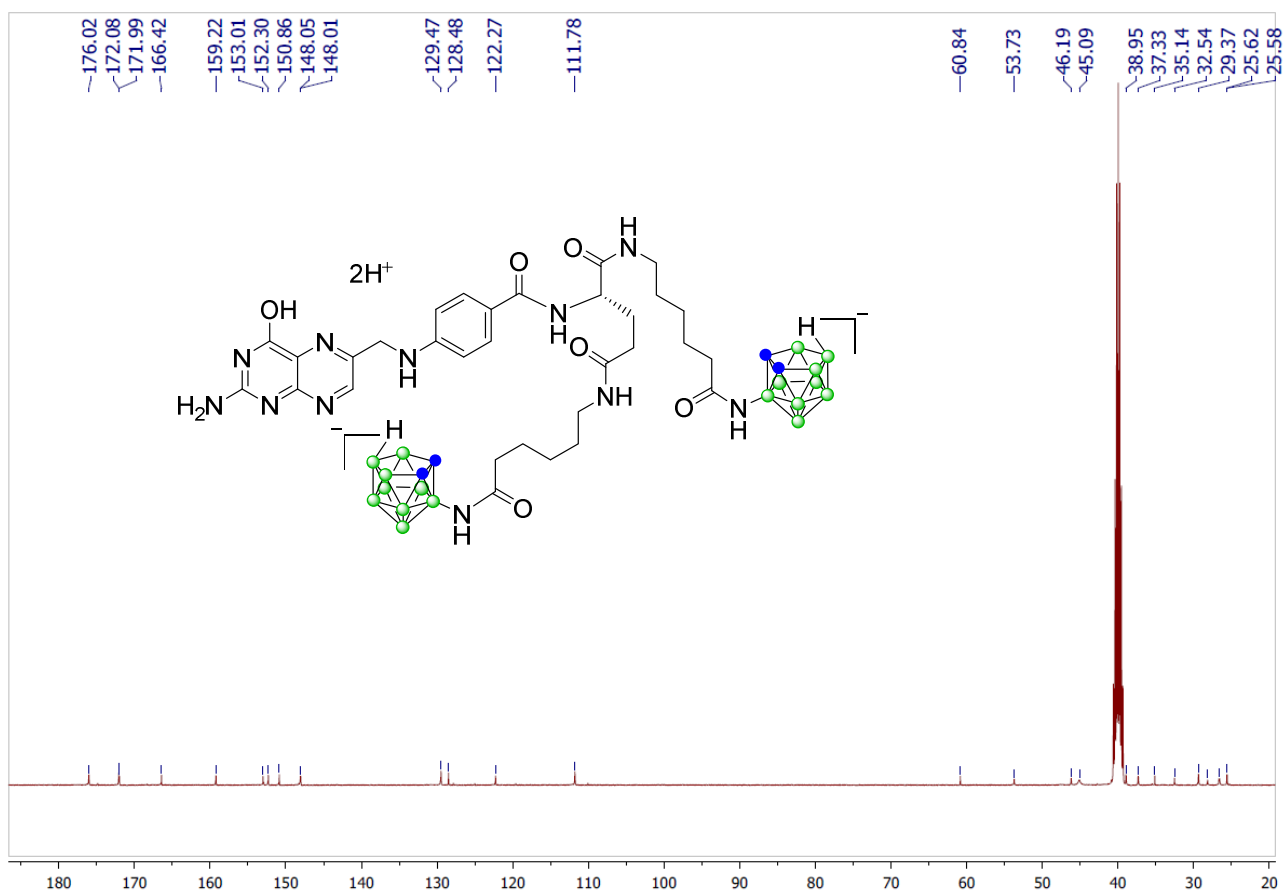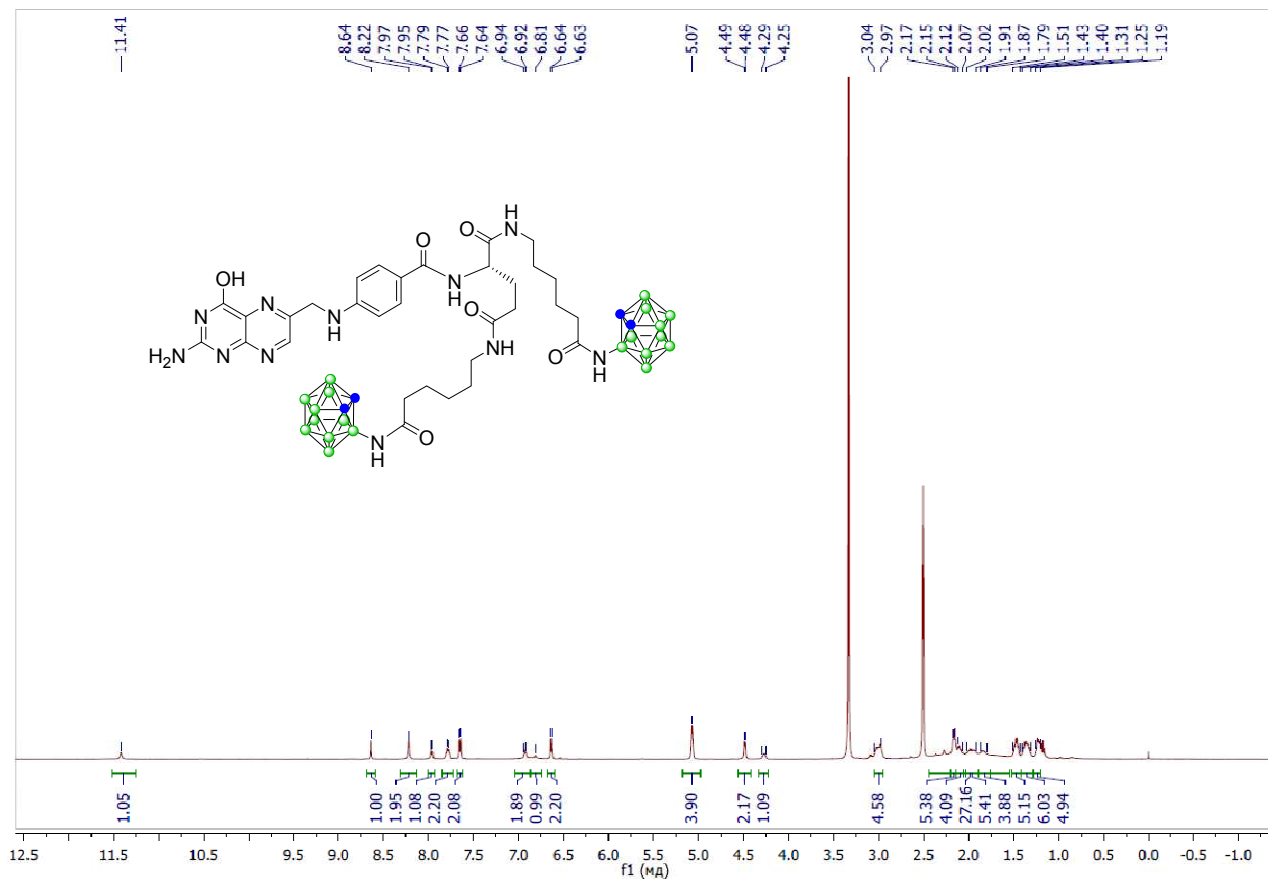

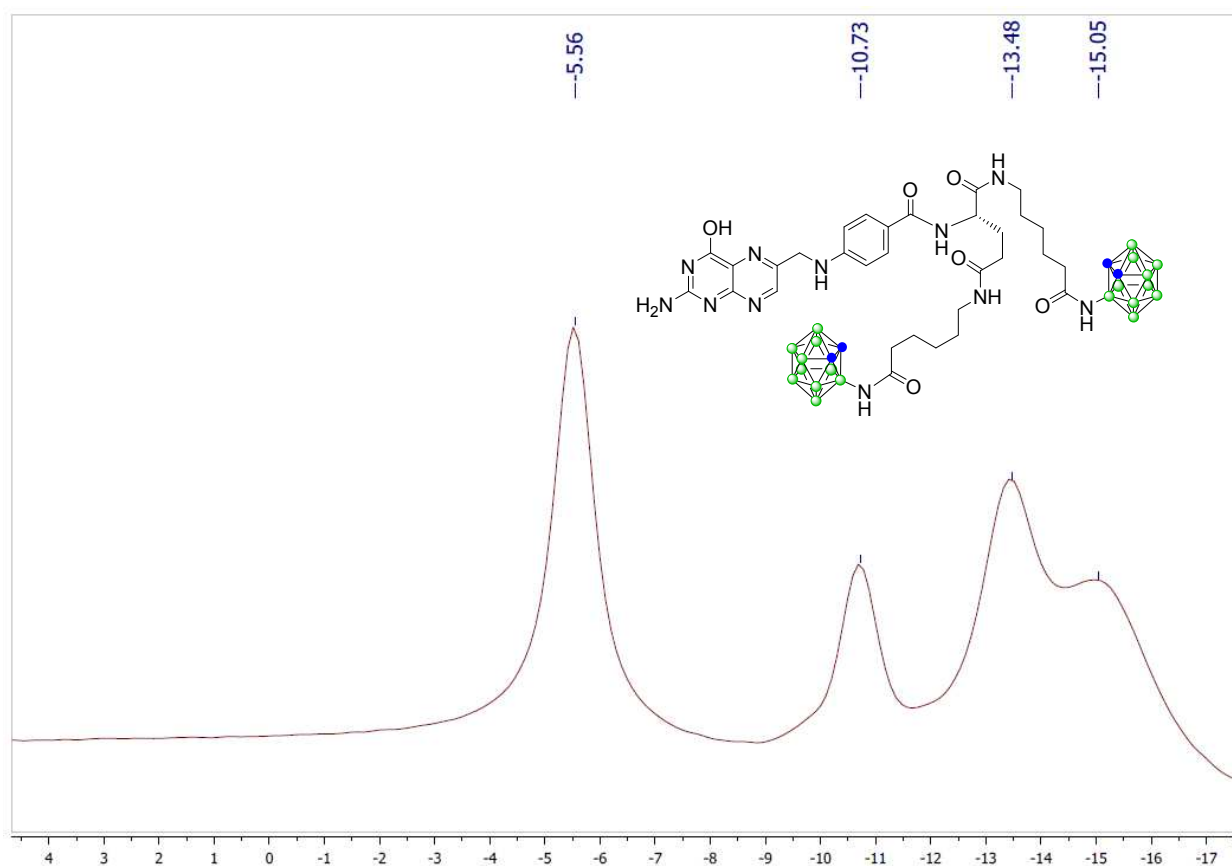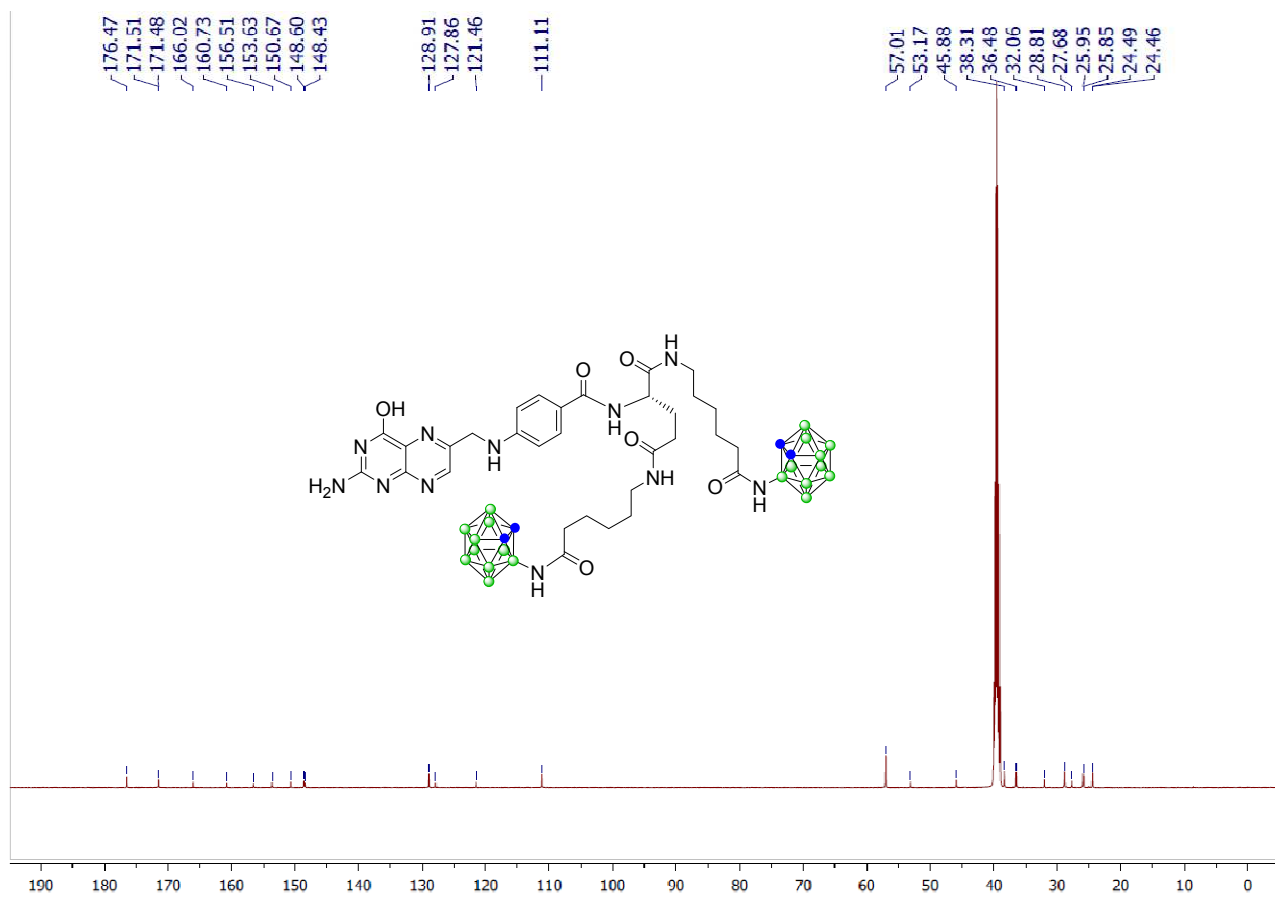

**Table S1.** Cell viability of various cell lines after 72-h co-incubation with compounds **3a** and **3b** and Cisplatin as a positive control<sup>a</sup>

| Cell line | Compound         | Concentration, mg/mL | Cell viability, % | SE, % <sup>b</sup> |
|-----------|------------------|----------------------|-------------------|--------------------|
| BJ-5ta    | <b>3a</b>        | 0.008                | 101.6             | 3.3                |
|           |                  | 0.016                | 102.8             | 2.5                |
|           |                  | 0.031                | 100.5             | 2.6                |
|           |                  | 0.063                | 104.0             | 0.9                |
|           |                  | 0.125                | 105.6             | 0.3                |
|           |                  | 0.250                | 99.2              | 2.6                |
|           |                  | 0.500                | 95.7              | 1.7                |
|           |                  | 1.000                | 76.2              | 2.1                |
|           | <b>3b</b>        | 0.008                | 110.6             | 0.8                |
|           |                  | 0.016                | 102.5             | 3.4                |
|           |                  | 0.031                | 99.2              | 5.5                |
|           |                  | 0.063                | 120.1             | 3.5                |
|           |                  | 0.125                | 136.9             | 4.1                |
|           |                  | 0.250                | 120.6             | 1.6                |
|           |                  | 0.500                | 87.9              | 3.1                |
|           |                  | 1.000                | 70.6              | 2.8                |
|           | <b>Cisplatin</b> | 0.0008               | 87.5              | 1.6                |
|           |                  | 0.0016               | 86.9              | 4.5                |
|           |                  | 0.0031               | 82.3              | 2.0                |
|           |                  | 0.0063               | 79.7              | 1.9                |
|           |                  | 0.0125               | 71.3              | 3.2                |
|           |                  | 0.0250               | 44.9              | 3.7                |
|           |                  | 0.0500               | 28.5              | 2.6                |
|           |                  | 0.1000               | 18.5              | 0.2                |
| DU 145    | <b>3a</b>        | 0.008                | 96.3              | 4.6                |
|           |                  | 0.016                | 92.3              | 2.6                |
|           |                  | 0.031                | 89.6              | 2.9                |
|           |                  | 0.063                | 85.9              | 1.2                |
|           |                  | 0.125                | 80.7              | 2.8                |
|           |                  | 0.250                | 60.8              | 1.7                |
|           |                  | 0.500                | 40.0              | 1.9                |
|           |                  | 1.000                | 17.9              | 0.7                |
|           | <b>3b</b>        | 0.008                | 102.3             | 3.0                |
|           |                  | 0.016                | 101.3             | 5.9                |
|           |                  | 0.031                | 103.5             | 3.3                |
|           |                  | 0.063                | 110.5             | 8.3                |
|           |                  | 0.125                | 91.8              | 3.6                |
|           |                  | 0.250                | 79.9              | 3.2                |
|           |                  | 0.500                | 67.9              | 3.3                |
|           |                  | 1.000                | 19.8              | 1.4                |
|           | <b>Cisplatin</b> | 0.0008               | 53.7              | 6.9                |
|           |                  | 0.0016               | 41.4              | 2.0                |
|           |                  | 0.0031               | 30.5              | 1.0                |
|           |                  | 0.0063               | 22.3              | 1.5                |
|           |                  | 0.0125               | 17.1              | 0.6                |
|           |                  | 0.0250               | 16.8              | 1.7                |
|           |                  | 0.0500               | 8.3               | 0.8                |
|           |                  | 0.1000               | 7.5               | 0.4                |



|            |                  |        |       |     |
|------------|------------------|--------|-------|-----|
| MDA-MB-231 | <b>3a</b>        | 0.008  | 90.2  | 4.1 |
|            |                  | 0.016  | 87.7  | 2.2 |
|            |                  | 0.031  | 88.4  | 3.0 |
|            |                  | 0.063  | 85.6  | 2.8 |
|            |                  | 0.125  | 81.3  | 1.6 |
|            |                  | 0.250  | 60.0  | 2.6 |
|            |                  | 0.500  | 38.7  | 4.5 |
|            |                  | 1.000  | 30.7  | 2.5 |
|            | <b>3b</b>        | 0.008  | 95.0  | 2.5 |
|            |                  | 0.016  | 86.2  | 2.6 |
|            |                  | 0.031  | 86.8  | 1.3 |
|            |                  | 0.063  | 81.7  | 1.0 |
|            |                  | 0.125  | 76.0  | 1.8 |
|            |                  | 0.250  | 65.0  | 4.9 |
|            |                  | 0.500  | 43.3  | 2.3 |
|            |                  | 1.000  | 28.1  | 1.9 |
|            | <b>Cisplatin</b> | 0.0008 | 85.0  | 4.1 |
|            |                  | 0.0016 | 77.3  | 2.4 |
|            |                  | 0.0031 | 71.0  | 2.9 |
|            |                  | 0.0063 | 55.9  | 5.8 |
|            |                  | 0.0125 | 33.4  | 1.6 |
|            |                  | 0.0250 | 20.5  | 1.1 |
|            |                  | 0.0500 | 13.9  | 0.4 |
|            |                  | 0.1000 | 12.8  | 0.5 |
| SK-Mel-28  | <b>3a</b>        | 0.008  | 104.7 | 1.6 |
|            |                  | 0.016  | 104.4 | 2.3 |
|            |                  | 0.031  | 104.4 | 2.2 |
|            |                  | 0.063  | 101.5 | 3.7 |
|            |                  | 0.125  | 101.5 | 3.5 |
|            |                  | 0.250  | 96.9  | 4.9 |
|            |                  | 0.500  | 91.1  | 2.6 |
|            |                  | 1.000  | 57.9  | 3.8 |
|            | <b>3b</b>        | 0.008  | 108.0 | 5.8 |
|            |                  | 0.016  | 109.8 | 5.0 |
|            |                  | 0.031  | 118.8 | 4.0 |
|            |                  | 0.063  | 133.1 | 3.6 |
|            |                  | 0.125  | 152.6 | 4.8 |
|            |                  | 0.250  | 121.4 | 5.4 |
|            |                  | 0.500  | 93.3  | 4.4 |
|            |                  | 1.000  | 59.1  | 3.6 |
|            | <b>Cisplatin</b> | 0.0008 | 93.0  | 1.0 |
|            |                  | 0.0016 | 93.7  | 2.3 |
|            |                  | 0.0031 | 76.9  | 2.1 |
|            |                  | 0.0063 | 58.2  | 1.8 |
|            |                  | 0.0125 | 35.9  | 0.8 |
|            |                  | 0.0250 | 25.0  | 0.5 |
|            |                  | 0.0500 | 15.6  | 1.3 |
|            |                  | 0.1000 | 14.3  | 1.1 |

|        |           |        |       |     |
|--------|-----------|--------|-------|-----|
| T98G   | 3a        | 0.008  | 103.5 | 7.1 |
|        |           | 0.016  | 99.6  | 5.0 |
|        |           | 0.031  | 92.4  | 2.2 |
|        |           | 0.063  | 90.1  | 2.5 |
|        |           | 0.125  | 81.3  | 2.6 |
|        |           | 0.250  | 62.8  | 3.9 |
|        |           | 0.500  | 32.8  | 1.4 |
|        |           | 1.000  | 27.6  | 1.4 |
|        | 3b        | 0.008  | 98.9  | 2.3 |
|        |           | 0.016  | 99.4  | 2.6 |
|        |           | 0.031  | 96.4  | 2.5 |
|        |           | 0.063  | 104.2 | 2.8 |
|        |           | 0.125  | 113.0 | 2.6 |
|        |           | 0.250  | 103.1 | 1.4 |
|        |           | 0.500  | 82.3  | 2.0 |
|        |           | 1.000  | 48.0  | 1.5 |
|        | Cisplatin | 0.0008 | 86.4  | 3.6 |
|        |           | 0.0016 | 81.9  | 1.5 |
|        |           | 0.0031 | 66.8  | 2.9 |
|        |           | 0.0063 | 39.1  | 2.2 |
|        |           | 0.0125 | 21.4  | 1.4 |
|        |           | 0.0250 | 12.3  | 0.2 |
|        |           | 0.0500 | 9.7   | 0.3 |
|        |           | 0.1000 | 9.3   | 0.5 |
| U87 MG | 3a        | 0.008  | 66.8  | 2.1 |
|        |           | 0.016  | 60.4  | 0.9 |
|        |           | 0.031  | 50.8  | 3.4 |
|        |           | 0.063  | 42.6  | 3.1 |
|        |           | 0.125  | 46.5  | 2.2 |
|        |           | 0.250  | 39.4  | 2.5 |
|        |           | 0.500  | 31.3  | 1.2 |
|        |           | 1.000  | 19.9  | 2.4 |
|        | 3b        | 0.008  | 80.0  | 1.9 |
|        |           | 0.016  | 74.1  | 5.8 |
|        |           | 0.031  | 63.0  | 2.0 |
|        |           | 0.063  | 53.5  | 2.3 |
|        |           | 0.125  | 62.1  | 4.0 |
|        |           | 0.250  | 60.6  | 2.2 |
|        |           | 0.500  | 40.9  | 1.3 |
|        |           | 1.000  | 19.1  | 1.9 |
|        | Cisplatin | 0.0008 | 68.2  | 3.4 |
|        |           | 0.0016 | 59.0  | 2.5 |
|        |           | 0.0031 | 42.8  | 3.0 |
|        |           | 0.0063 | 21.7  | 2.2 |
|        |           | 0.0125 | 18.0  | 1.1 |
|        |           | 0.0250 | 15.0  | 1.0 |
|        |           | 0.0500 | 10.6  | 1.9 |
|        |           | 0.1000 | 6.1   | 0.5 |

<sup>a</sup> Results of three independent experiments are presented

<sup>b</sup> SE is the standard error calculated according to equation:  $SE = s/\sqrt{3}$ , where s is the standard deviation

## Boron Accumulation Assay

Boron accumulation in U87 MG, MDA-MB-231, SK-Mel-28, DU 145, T98G, and BJ-5ta cells was assessed after incubation in the presence of compounds **3a** and **3b** (0.25 mg/mL in the case of U87 MG cells; 0.5 mg/mL in other cases) for 10 min, 30 min, 1 h, 3 h, 6 h and 8 h. For analysis, 1 mL of the medium was taken, the number of cells was determined on a Countess automatic cell counter (Invitrogen, Waltham, MA, USA) and the boron content was analyzed using ICP-OES as described in [Tsygankova, A.R.; Kanygin, V.V.; Kasatova, A.I.; et al. Determination of boron by inductively coupled plasma atomic emission spectroscopy. Biodistribution of  $^{10}\text{B}$  in tumour-bearing mice. *Russ. Chem. Bull.* **2020**, *69*, 601–607. <https://doi.org/10.1007/s11172-020-2805-8>]. The relative standard deviation (RSD) did not exceed 25% for the determination of boron by the ICP-AES method. Results of three independent experiments are presented.

**Table S2.** Boron accumulation by U87 MG human glioblastoma cells

| Compound  | Number of cells, $\times 10^6$ | Incubation time | Boron content in cells, $\mu\text{g B}/10^6$ cells |
|-----------|--------------------------------|-----------------|----------------------------------------------------|
| <b>3a</b> | 3.0                            | 10 min          | 0.01                                               |
|           |                                |                 | 0.01                                               |
|           |                                |                 | 0.01                                               |
|           | 2.5                            | 30 min          | 0.13                                               |
|           |                                |                 | 0.15                                               |
|           |                                |                 | 0.13                                               |
|           | 2.0                            | 1 h             | 0.12                                               |
|           |                                |                 | 0.09                                               |
|           |                                |                 | 0.09                                               |
|           | 3.0                            | 3 h             | 0.08                                               |
|           |                                |                 | 0.07                                               |
|           |                                |                 | 0.07                                               |
|           | 3.0                            | 6 h             | 0.10                                               |
|           |                                |                 | 0.11                                               |
|           |                                |                 | 0.10                                               |
|           | 2.5                            | 8 h             | 0.09                                               |
|           |                                |                 | 0.07                                               |
|           |                                |                 | 0.07                                               |
| <b>3b</b> | 1.0                            | 10 min          | 0.63                                               |
|           |                                |                 | 0.59                                               |
|           |                                |                 | 0.58                                               |
|           | 1.0                            | 30 min          | 3.80                                               |
|           |                                |                 | 3.60                                               |
|           |                                |                 | 3.78                                               |
|           | 1.0                            | 1 h             | 3.22                                               |
|           |                                |                 | 3.20                                               |
|           |                                |                 | 3.90                                               |
|           | 1.0                            | 3 h             | 3.40                                               |
|           |                                |                 | 4.17                                               |
|           |                                |                 | 3.21                                               |
|           | 1.0                            | 6 h             | 5.50                                               |
|           |                                |                 | 5.81                                               |
|           |                                |                 | 5.80                                               |
|           | 1.0                            | 8 h             | 7.70                                               |
|           |                                |                 | 6.62                                               |
|           |                                |                 | 6.70                                               |

**Table S3.** Boron accumulation by MDA-MB-231 human breast carcinoma cells

| Compound  | Number of cells, $\times 10^6$ | Incubation time | Boron content in cells, $\mu\text{g B}/10^6$ cells |
|-----------|--------------------------------|-----------------|----------------------------------------------------|
| <b>3a</b> | 1.0                            | 10 min          | 0.50                                               |
|           |                                |                 | 0.53                                               |
|           |                                |                 | 0.44                                               |
|           | 0.7                            | 30 min          | 0.74                                               |
|           |                                |                 | 0.76                                               |
|           |                                |                 | 0.80                                               |
|           | 1.0                            | 1 h             | 0.50                                               |
|           |                                |                 | 0.46                                               |
|           |                                |                 | 0.54                                               |
|           | 1.0                            | 3 h             | 0.42                                               |
|           |                                |                 | 0.42                                               |
|           |                                |                 | 0.37                                               |
|           | 1.0                            | 6 h             | 0.69                                               |
|           |                                |                 | 0.73                                               |
|           |                                |                 | 0.72                                               |
|           | 1.4                            | 8 h             | 0.46                                               |
|           |                                |                 | 0.46                                               |
|           |                                |                 | 0.51                                               |
| <b>3b</b> | 0.7                            | 10 min          | 2.00                                               |
|           |                                |                 | 2.14                                               |
|           |                                |                 | 1.86                                               |
|           | 0.9                            | 30 min          | 1.67                                               |
|           |                                |                 | 1.56                                               |
|           |                                |                 | 2.11                                               |
|           | 1.0                            | 1 h             | 2.60                                               |
|           |                                |                 | 2.50                                               |
|           |                                |                 | 2.70                                               |
|           | 1.0                            | 3 h             | 1.40                                               |
|           |                                |                 | 1.60                                               |
|           |                                |                 | 1.40                                               |
|           | 1.0                            | 6 h             | 1.30                                               |
|           |                                |                 | 1.40                                               |
|           |                                |                 | 1.80                                               |
|           | 1.0                            | 8 h             | 2.00                                               |
|           |                                |                 | 2.60                                               |
|           |                                |                 | 3.00                                               |

**Table S4.** Boron accumulation by SK-Mel28 human melanoma cells

| Compound  | Number of cells, $\times 10^6$ | Incubation time | Boron content in cells, $\mu\text{g B}/10^6$ cells |
|-----------|--------------------------------|-----------------|----------------------------------------------------|
| <b>3a</b> | 2.0                            | 10 min          | 0.02                                               |
|           |                                |                 | 0.02                                               |
|           |                                |                 | 0.02                                               |
|           | 0.9                            | 30 min          | 0.04                                               |
|           |                                |                 | 0.03                                               |
|           |                                |                 | 0.04                                               |
|           | 1.2                            | 1 h             | 0.06                                               |
|           |                                |                 | 0.06                                               |
|           |                                |                 | 0.09                                               |
|           | 0.8                            | 3 h             | 0.08                                               |
|           |                                |                 | 0.06                                               |
|           |                                |                 | 0.07                                               |
|           | 0.8                            | 6 h             | 0.09                                               |
|           |                                |                 | 0.02                                               |
|           |                                |                 | 0.07                                               |
|           | 1.3                            | 8 h             | 0.05                                               |
|           |                                |                 | 0.05                                               |
|           |                                |                 | 0.04                                               |
| <b>3b</b> | 0.9                            | 10 min          | 0.05                                               |
|           |                                |                 | 0.07                                               |
|           |                                |                 | 0.06                                               |
|           | 1.2                            | 30 min          | 0.13                                               |
|           |                                |                 | 0.16                                               |
|           |                                |                 | 0.13                                               |
|           | 1.0                            | 1 h             | 0.11                                               |
|           |                                |                 | 0.11                                               |
|           |                                |                 | 0.10                                               |
|           | 0.9                            | 3 h             | 0.28                                               |
|           |                                |                 | 0.29                                               |
|           |                                |                 | 0.26                                               |
|           | 0.9                            | 6 h             | 0.87                                               |
|           |                                |                 | 1.07                                               |
|           |                                |                 | 0.51                                               |
|           | 2.0                            | 8 h             | 0.15                                               |
|           |                                |                 | 0.15                                               |
|           |                                |                 | 0.14                                               |

**Table S5.** Boron accumulation by DU145 human prostate carcinoma cells

| Compound  | Number of cells, $\times 10^6$ | Incubation time | Boron content in cells, $\mu\text{g B}/10^6$ cells |
|-----------|--------------------------------|-----------------|----------------------------------------------------|
| <b>3a</b> | 3.2                            | 10 min          | 0.06                                               |
|           |                                |                 | 0.05                                               |
|           |                                |                 | 0.04                                               |
|           | 2.8                            | 30 min          | 0.10                                               |
|           |                                |                 | 0.09                                               |
|           |                                |                 | 0.08                                               |
|           | 3.0                            | 1 h             | 0.09                                               |
|           |                                |                 | 0.10                                               |
|           |                                |                 | 0.14                                               |
|           | 2.4                            | 3 h             | 0.27                                               |
|           |                                |                 | 0.28                                               |
|           |                                |                 | 0.28                                               |
|           | 1.6                            | 6 h             | 0.69                                               |
|           |                                |                 | 0.65                                               |
|           |                                |                 | 0.72                                               |
|           | 3.4                            | 8 h             | 0.22                                               |
|           |                                |                 | 0.20                                               |
|           |                                |                 | 0.20                                               |
| <b>3b</b> | 2.2                            | 10 min          | 0.25                                               |
|           |                                |                 | 0.24                                               |
|           |                                |                 | 0.25                                               |
|           | 2.8                            | 30 min          | 0.20                                               |
|           |                                |                 | 0.18                                               |
|           |                                |                 | 0.18                                               |
|           | 3.6                            | 1 h             | 0.12                                               |
|           |                                |                 | 0.12                                               |
|           |                                |                 | 0.12                                               |
|           | 2.4                            | 3 h             | 0.31                                               |
|           |                                |                 | 0.35                                               |
|           |                                |                 | 0.34                                               |
|           | 2.8                            | 6 h             | 0.27                                               |
|           |                                |                 | 0.28                                               |
|           |                                |                 | 0.23                                               |
|           | 3.0                            | 8 h             | 0.42                                               |
|           |                                |                 | 0.43                                               |
|           |                                |                 | 0.42                                               |

**Table S6.** Boron accumulation by T98G human glioblastoma cells

| Compound  | Number of cells, $\times 10^6$ | Incubation time | Boron content in cells, $\mu\text{g B}/10^6$ cells |
|-----------|--------------------------------|-----------------|----------------------------------------------------|
| <b>3a</b> | 2.8                            | 10 min          | 0.08                                               |
|           |                                |                 | 0.05                                               |
|           |                                |                 | 0.05                                               |
|           | 2.8                            | 30 min          | 0.06                                               |
|           |                                |                 | 0.06                                               |
|           |                                |                 | 0.05                                               |
|           | 1.3                            | 1 h             | 0.22                                               |
|           |                                |                 | 0.23                                               |
|           |                                |                 | 0.22                                               |
|           | 1.0                            | 3 h             | 0.29                                               |
|           |                                |                 | 0.36                                               |
|           |                                |                 | 0.34                                               |
|           | 1.1                            | 6 h             | 0.34                                               |
|           |                                |                 | 0.37                                               |
|           |                                |                 | 0.35                                               |
|           | 1.3                            | 8 h             | 0.35                                               |
|           |                                |                 | 0.39                                               |
|           |                                |                 | 0.39                                               |
| <b>3b</b> | 2.8                            | 10 min          | 0.14                                               |
|           |                                |                 | 0.14                                               |
|           |                                |                 | 0.10                                               |
|           | 1.9                            | 30 min          | 0.27                                               |
|           |                                |                 | 0.31                                               |
|           |                                |                 | 0.30                                               |
|           | 1.0                            | 1 h             | 0.89                                               |
|           |                                |                 | 1.00                                               |
|           |                                |                 | 0.89                                               |
|           | 0.9                            | 3 h             | 0.54                                               |
|           |                                |                 | 0.54                                               |
|           |                                |                 | 0.52                                               |
|           | 1.4                            | 6 h             | 0.61                                               |
|           |                                |                 | 0.49                                               |
|           |                                |                 | 0.56                                               |
|           | 1.2                            | 8 h             | 0.79                                               |
|           |                                |                 | 0.81                                               |
|           |                                |                 | 0.83                                               |

**Table S7.** Boron accumulation by BJ-5ta human foreskin fibroblasts

| Compound  | Number of cells, $\times 10^6$ | Incubation time | Boron content in cells, $\mu\text{g B}/10^6$ cells |
|-----------|--------------------------------|-----------------|----------------------------------------------------|
| <b>3a</b> | 1.0                            | 10 min          | 0.03                                               |
|           |                                |                 | 0.04                                               |
|           |                                |                 | 0.08                                               |
|           | 0.6                            | 30 min          | 0.30                                               |
|           |                                |                 | 0.17                                               |
|           |                                |                 | 0.20                                               |
|           | 1.5                            | 1 h             | 0.05                                               |
|           |                                |                 | 0.06                                               |
|           |                                |                 | 0.04                                               |
|           | 1.3                            | 3 h             | 0.24                                               |
|           |                                |                 | 0.24                                               |
|           |                                |                 | 0.24                                               |
|           | 1.8                            | 6 h             | 0.10                                               |
|           |                                |                 | 0.09                                               |
|           |                                |                 | 0.09                                               |
|           | 0.8                            | 8 h             | 0.51                                               |
|           |                                |                 | 0.50                                               |
|           |                                |                 | 0.52                                               |
| <b>3b</b> | 0.7                            | 10 min          | 0.76                                               |
|           |                                |                 | 0.82                                               |
|           |                                |                 | 0.86                                               |
|           | 1.5                            | 30 min          | 0.67                                               |
|           |                                |                 | 0.74                                               |
|           |                                |                 | 0.74                                               |
|           | 0.9                            | 1 h             | 0.82                                               |
|           |                                |                 | 0.98                                               |
|           |                                |                 | 0.98                                               |
|           | 1.0                            | 3 h             | 0.66                                               |
|           |                                |                 | 0.75                                               |
|           |                                |                 | 0.68                                               |
|           | 1.8                            | 6 h             | 0.28                                               |
|           |                                |                 | 0.31                                               |
|           |                                |                 | 0.37                                               |
|           | 1.8                            | 8 h             | 0.32                                               |
|           |                                |                 | 0.33                                               |
|           |                                |                 | 0.35                                               |
